# Supplementary material for: Effects of intrinsic defects and extrinsic doping on the electronic and photocatalytic properties of Ta3N5
Source: Royal Society of Chemistry journal article supplement (doi:10.1039/c5ra08563b), 2015-01-01
Supplement: c5ra08563b1.pdf [file c5ra08563b1.pdf]

## Supporting Information

### Effects of intrinsic defects and extrinsic doping on the electronic and photocatalytic properties of Ta<sub>3</sub>N<sub>5</sub>

Tao Jing,<sup>a,b</sup> Ying Dai,<sup>\*a</sup> Xiangchao Ma,<sup>a</sup> Wei Wei,<sup>a</sup> and Baibiao Huang<sup>a</sup>

<sup>a</sup> School of Physics, State Key Laboratory of Crystal Materials, Shandong University, Jinan 250100, People's Republic of China

<sup>b</sup> College of Physics and Electronic Engineering, Kaili University, Kaili Guizhou 556011, People's Republic of China

\*E-mail: daiy60@sina.com

#### Correction for the image charge interactions

Due to the limited size of the supercell, the correction for image charge interactions is include in the defect formation energy calculation, and only the corrections for defects with high charge states, i.e. N<sub>V3</sub>, N<sub>V4</sub> and Ta<sub>i</sub>, are taken into account, since the image charge interaction is small for the other defects with low charge states. To estimate the magnitude and decay behavior of this interactions, the supercells containing 96, 128, 160 and 384 atoms are employed, and the formation energies of these defects are plotted as a function of L<sup>-1</sup>, where L is the cube root of the corresponding supercell volume. We note that the defect formation energies are not linear with L<sup>-1</sup>, indicating that the elastic interaction may make a considerable contribution to them. However, the formation energies achieve a good convergence when the atom number of supercell reaches 384. Therefore, the 384 atom supercell is adopted to correct the defect formation energies of N<sub>V3</sub>, N<sub>V4</sub> and Ta<sub>i</sub>.

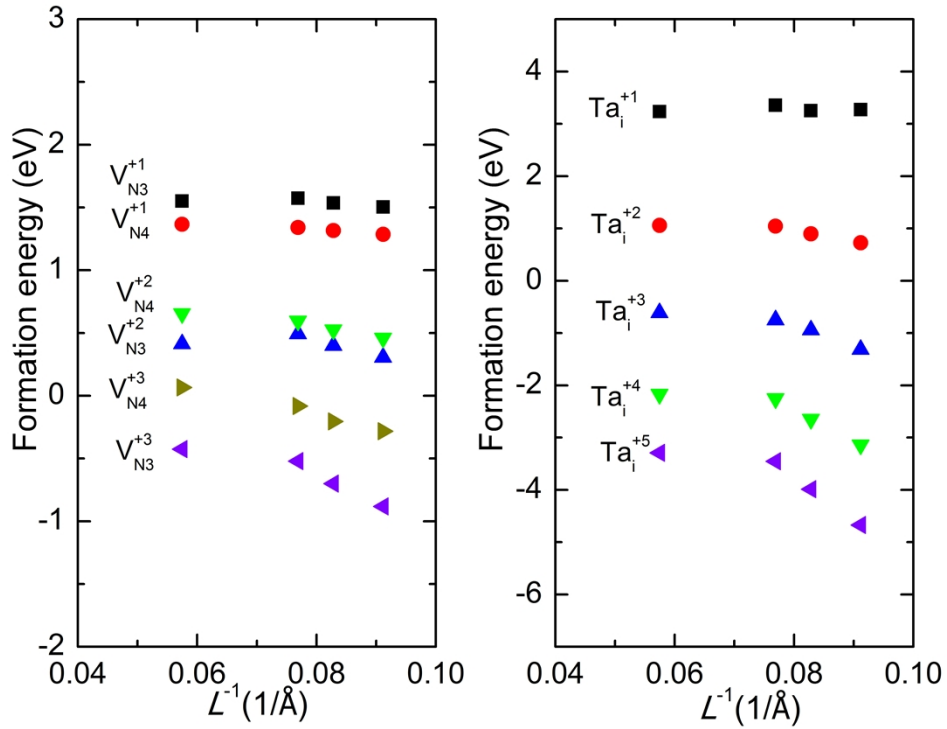

**Figure S1** The defect formation energies of  $N_{V3}$ ,  $N_{V4}$  and  $Ta_i$  as a function of supercell size.

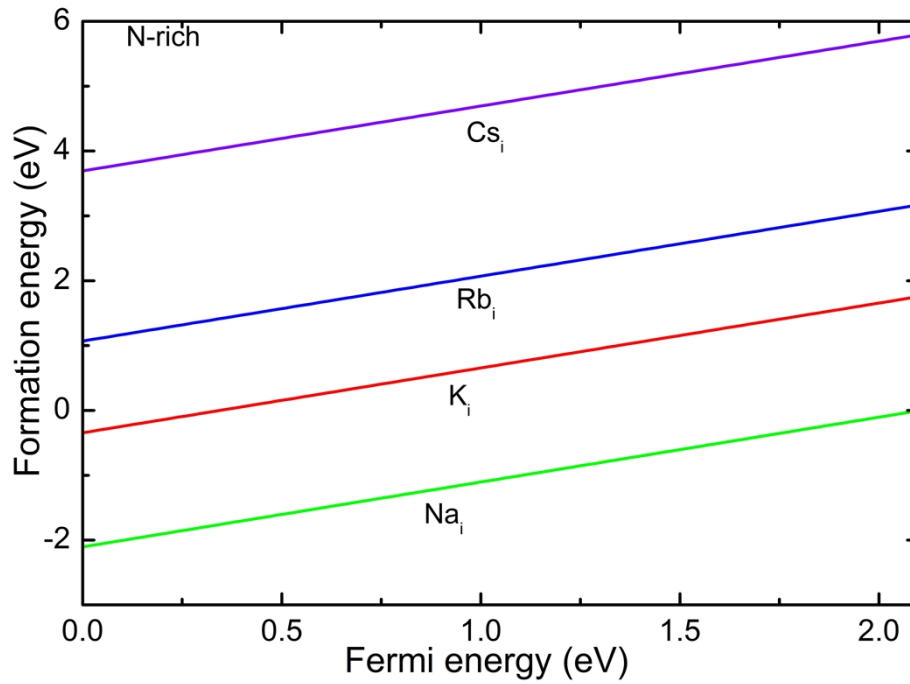

**Figure S2** Calculated formation energies of defects as a function of the Fermi energy of

alkali metal interstitial doped  $Ta_3N_5$  under N-rich condition.

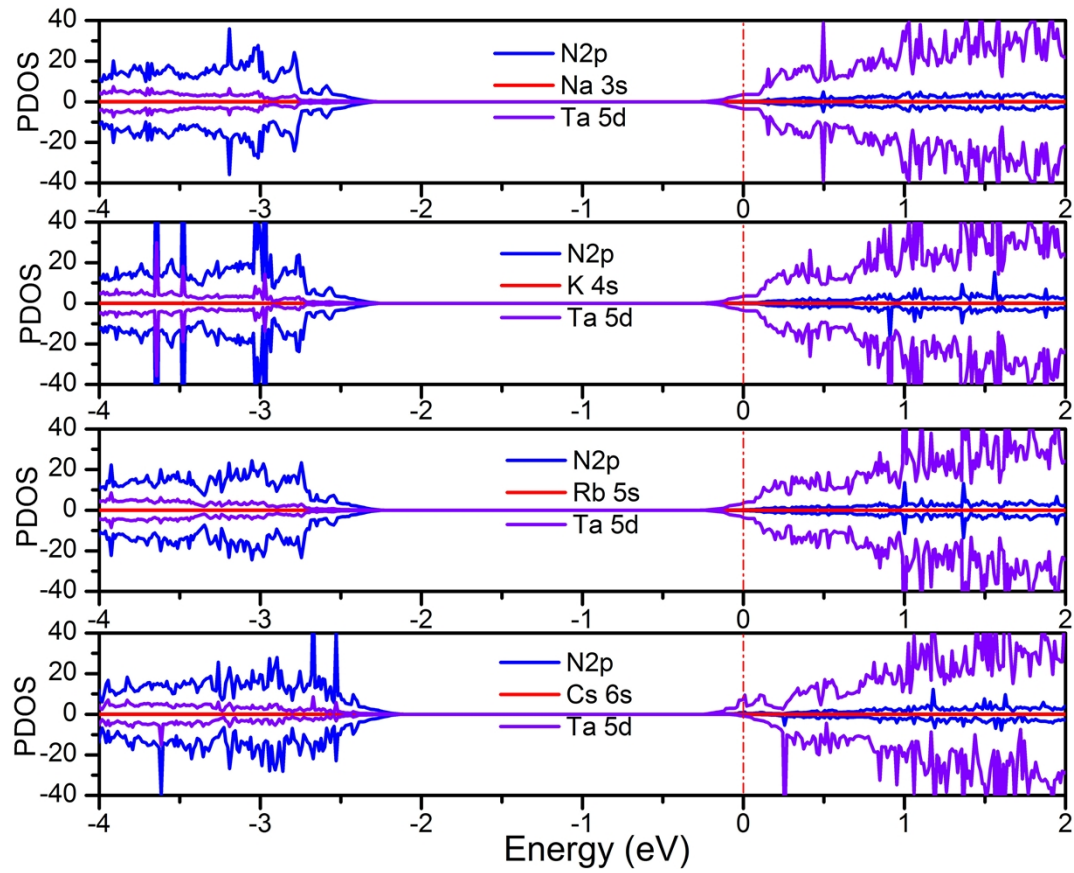

**Figure 3** Calculated projected density of states (PDOS) for interstitial Na (a), K (b), Rb (c) and Cs (d) doped  $Ta_3N_5$ .
